# Supplementary material for: Second near-infrared upconversion and downconversion luminescence in a core–multishell nanophotoswitch
Source: Royal Society of Chemistry journal article supplement (doi:10.1039/d2nj01793h), 2022-01-01
Supplement: d2nj01793h1.pdf [file d2nj01793h1.pdf]

# Supporting Information

## Second Near-Infrared Upconverting and Downshifting Luminescence in a Core-Multishell Nanophotoswitch

Hao Lin,<sup>a,b,\*</sup> Zhiyuan Cheng,<sup>c</sup> Dekang Xu,<sup>d</sup> Xuegang Zheng,<sup>a,b</sup> Tong Liu,<sup>c</sup> Liqin Xu,<sup>a</sup> Ying Ma<sup>a</sup>  
and Yueli Zhang<sup>c,\*</sup>

<sup>a</sup> School of Physics and Materials Science, Guangzhou University, Guangzhou 510006, P. R. China

<sup>b</sup> Research Center for Advanced Information Materials, Huangpu Research & Graduate School of Guangzhou University, Guangzhou 510555, P. R. China

<sup>c</sup> State Key Laboratory of Optoelectronic Materials and Technologies, School of Materials Science and Engineering, Sun Yat-sen University, Guangzhou 510275, P. R. China

<sup>d</sup> School of Chemistry and Materials Engineering, Huizhou University, Huizhou 516007, P. R. China

\*Corresponding Authors

Dr. Hao Lin

E-mail: [linhao@gzhu.edu.cn](mailto:linhao@gzhu.edu.cn)

ORCID: 0000-0002-1274-7131 (Hao Lin)

Prof. Yueli Zhang

E-mail: [stszyl@mail.sysu.edu.cn](mailto:stszyl@mail.sysu.edu.cn)

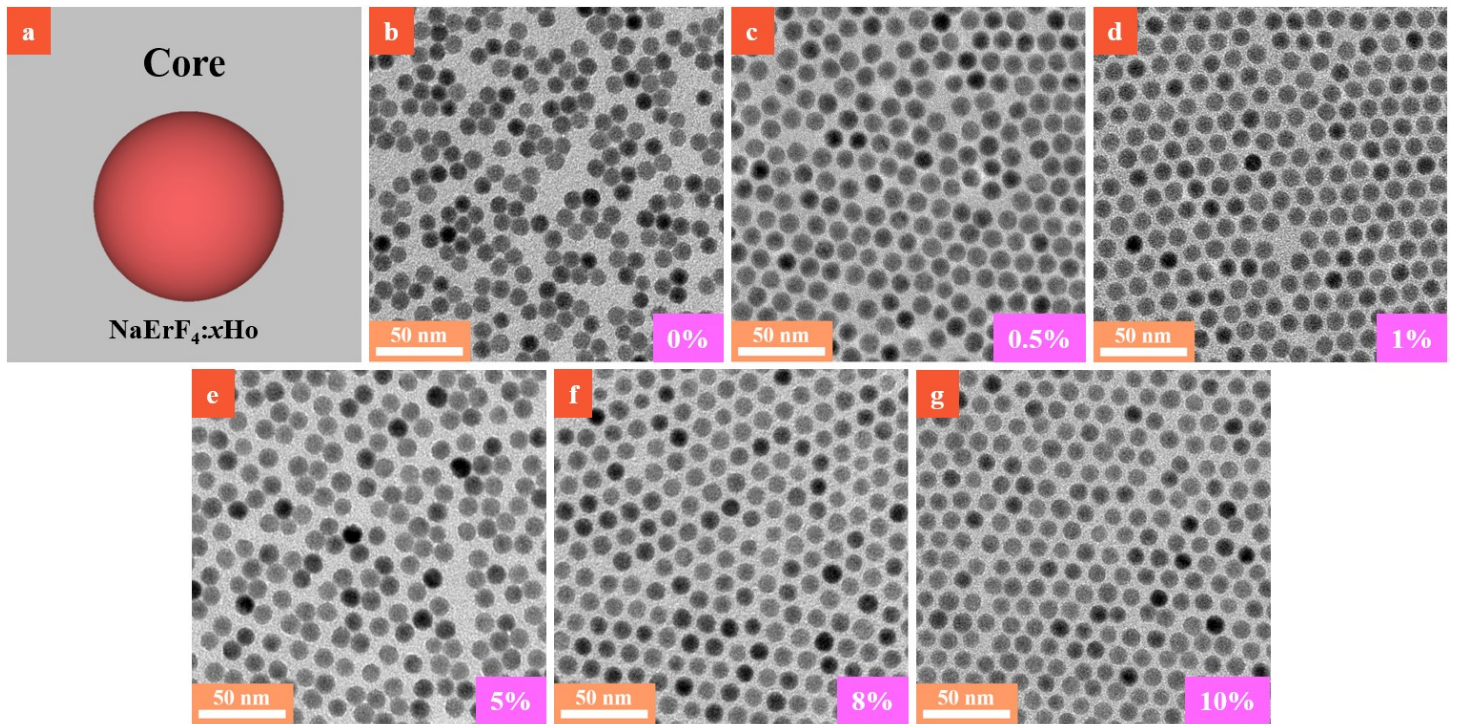

**Fig. S1** Schematic model (a) and TEM images (b-g) of NaErF<sub>4</sub>:xHo ( $x = 0, 0.5, 1, 5, 8, 10\%$ ) core nanoparticles.

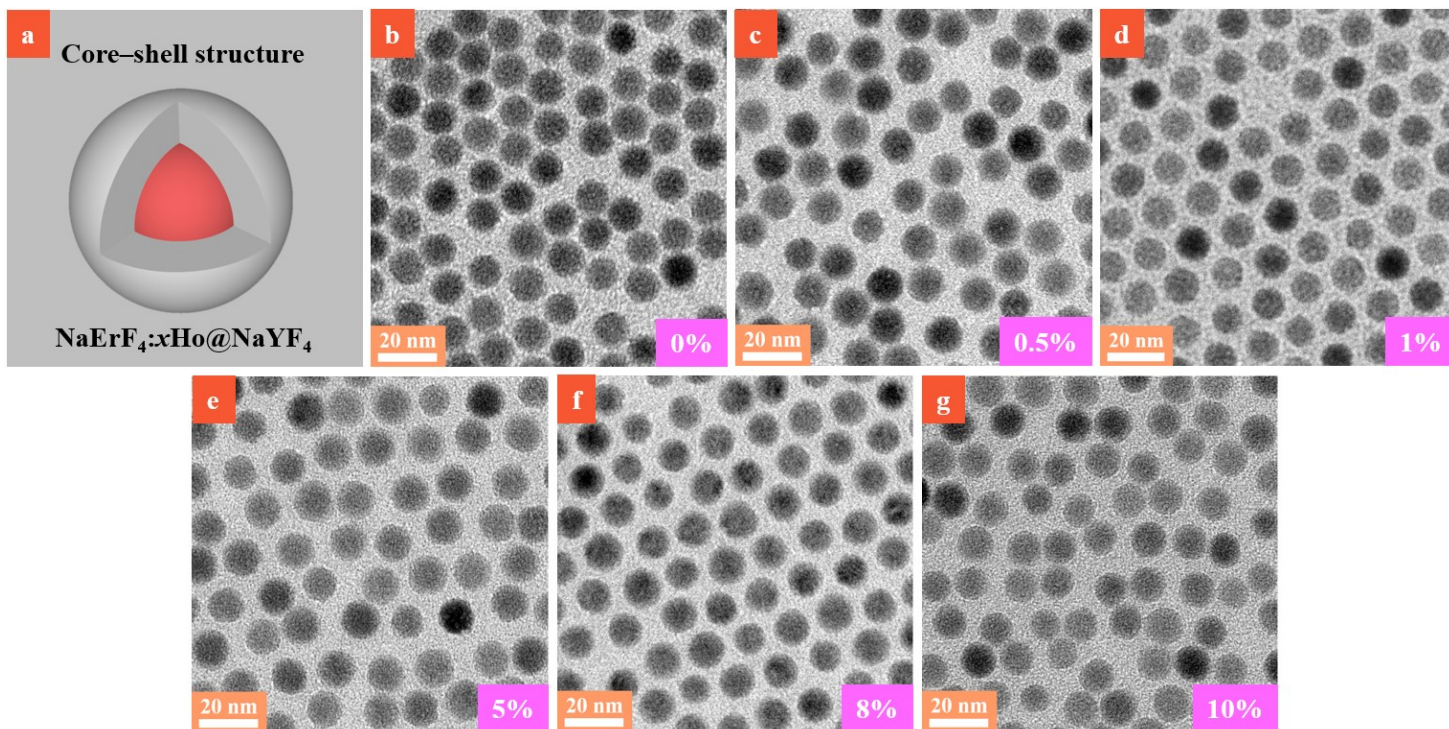

**Fig. S2** Schematic model (a) and TEM images (b-g) of  $\text{NaErF}_4:x\text{Ho}@NaYF_4$  ( $x = 0, 0.5, 1, 5, 8, 10\%$ ) core/shell nanoparticles.

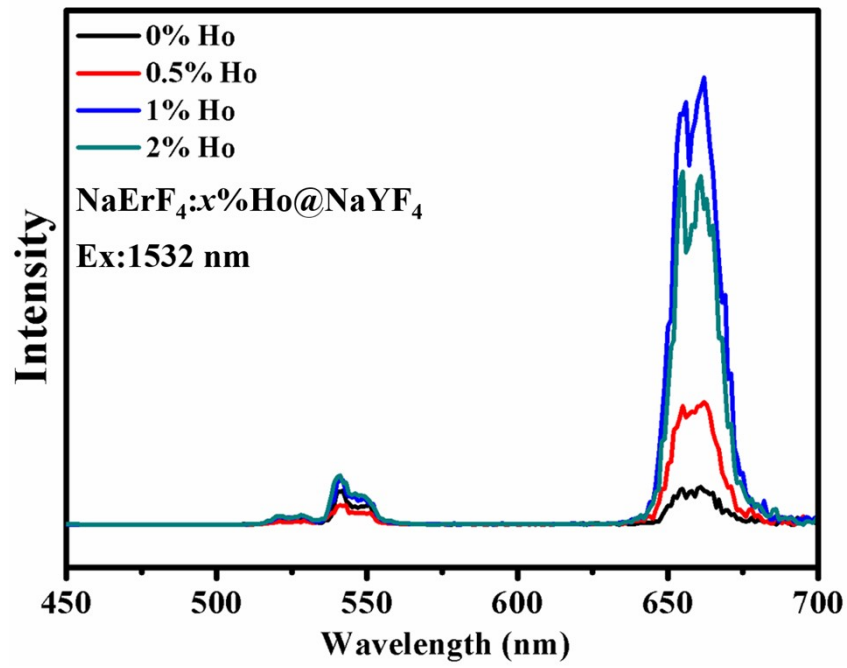

**Fig. S3** UC emission spectra of NaErF<sub>4</sub>:xHo@NaYF<sub>4</sub> ( $x = 0, 0.5, 1, 2\%$ ) nanoparticles under 1532 nm excitation.

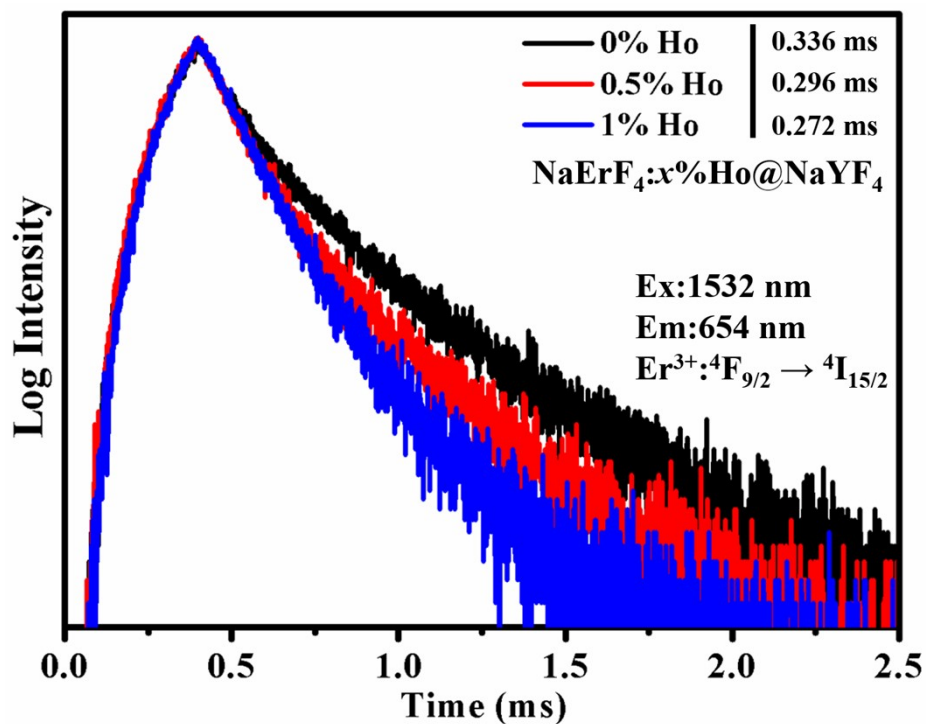

**Fig. S4** Decay curves of Er<sup>3+</sup> 654 nm emission (<sup>4</sup>F<sub>9/2</sub> → <sup>4</sup>I<sub>15/2</sub>) in NaErF<sub>4</sub>:xHo@NaYF<sub>4</sub> (x = 0, 0.5, 1%) nanoparticles under 1532 nm excitation.

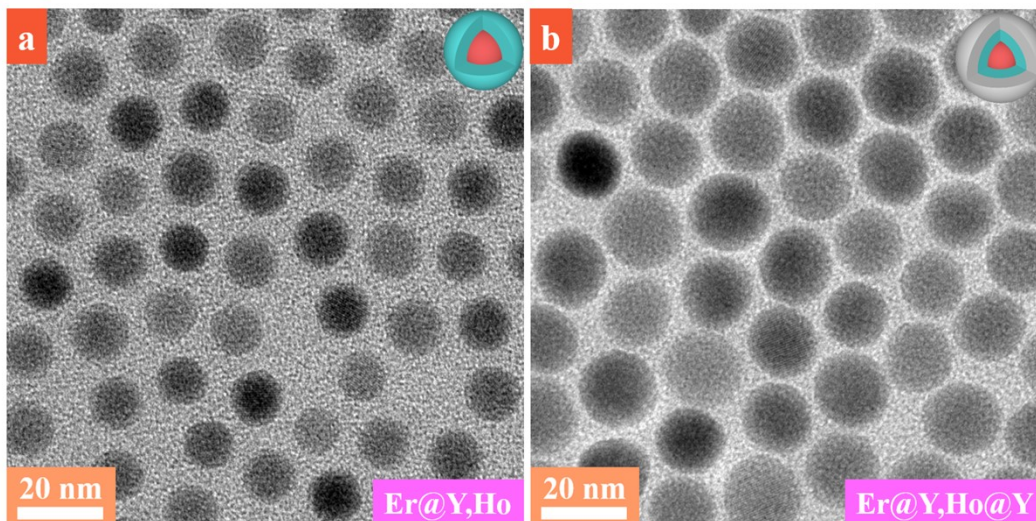

**Fig. S5** TEM images (a and b) of  $\text{NaErF}_4@ \text{NaYF}_4:2\% \text{Ho}$  and  $\text{NaErF}_4@ \text{NaYF}_4:2\% \text{Ho}@ \text{NaYF}_4$  nanoparticles. The upper right of (a and b) are the schematic models of core/shell and core/shell/shell structures.

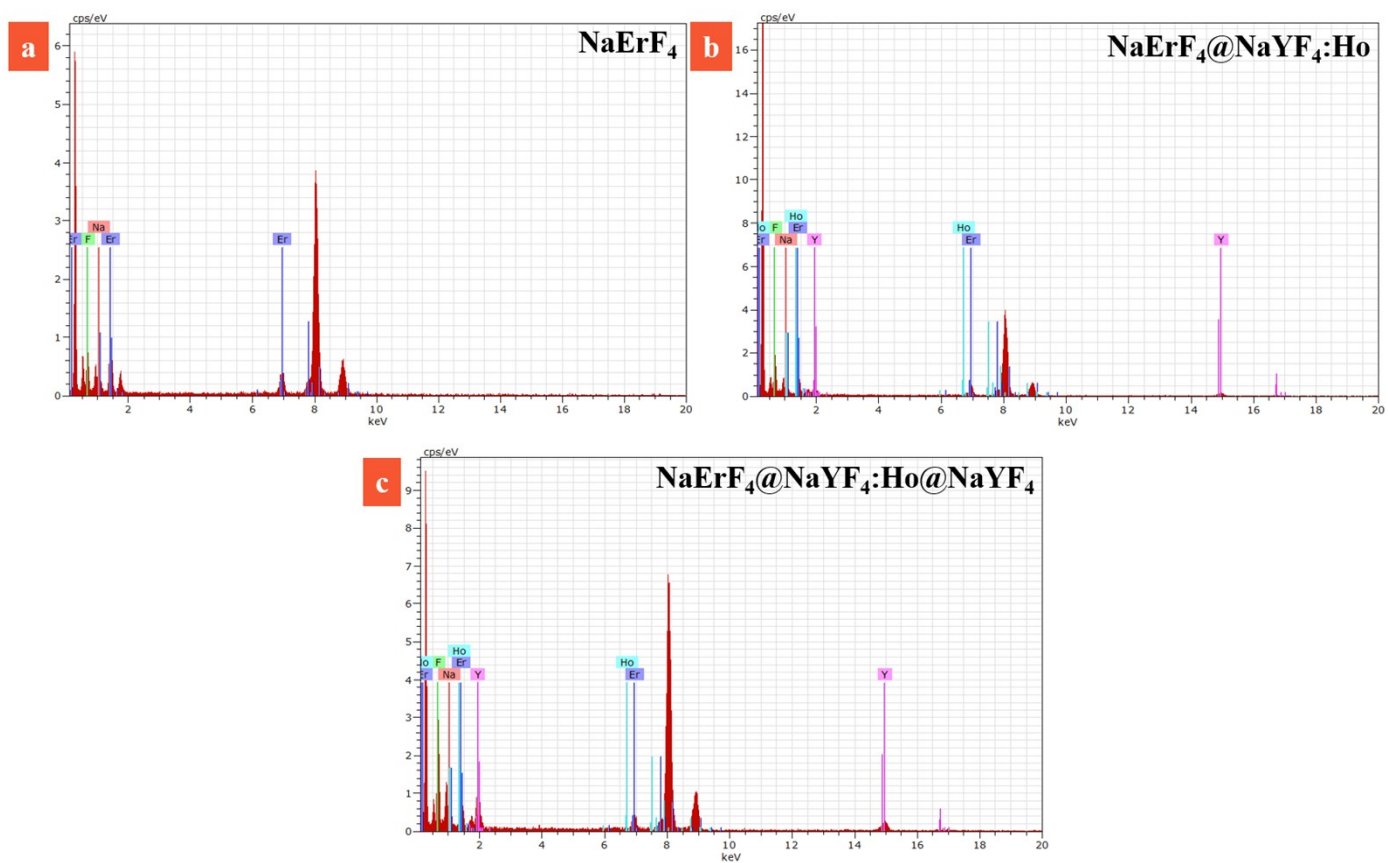

**Fig. S6** EDS (a-c) of  $\text{NaErF}_4$ ,  $\text{NaErF}_4@NaYF_4:2\%Ho$  and  $\text{NaErF}_4@NaYF_4:2\%Ho@NaYF_4$  nanoparticles, respectively.

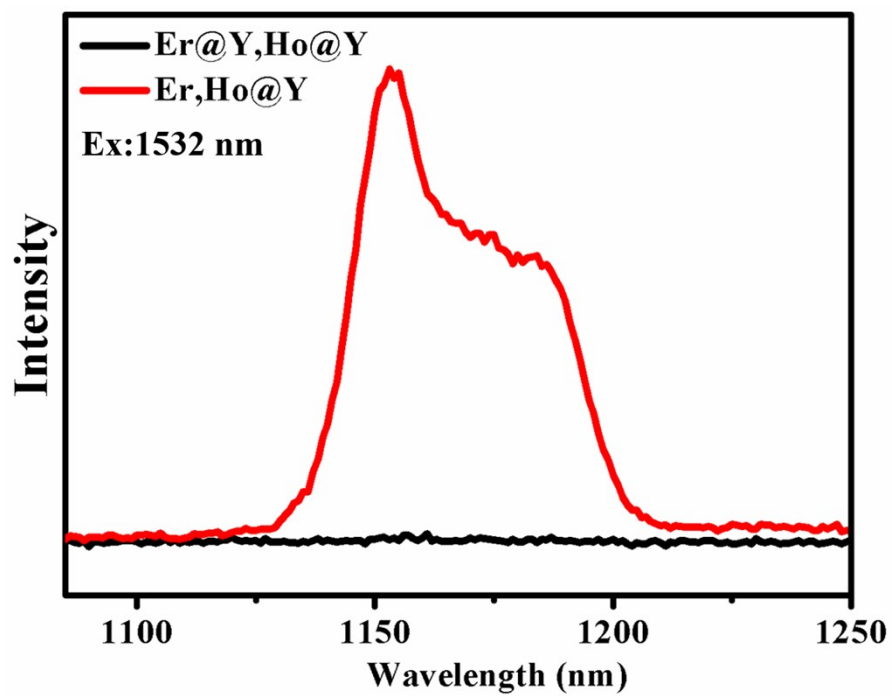

**Fig. S7** UC emission spectra of  $\text{NaErF}_4@ \text{NaYF}_4: 2\% \text{Ho} @ \text{NaYF}_4$  and  $\text{NaErF}_4: 2\% \text{Ho} @ \text{NaYF}_4$  nanoparticles under 1532 nm excitation.



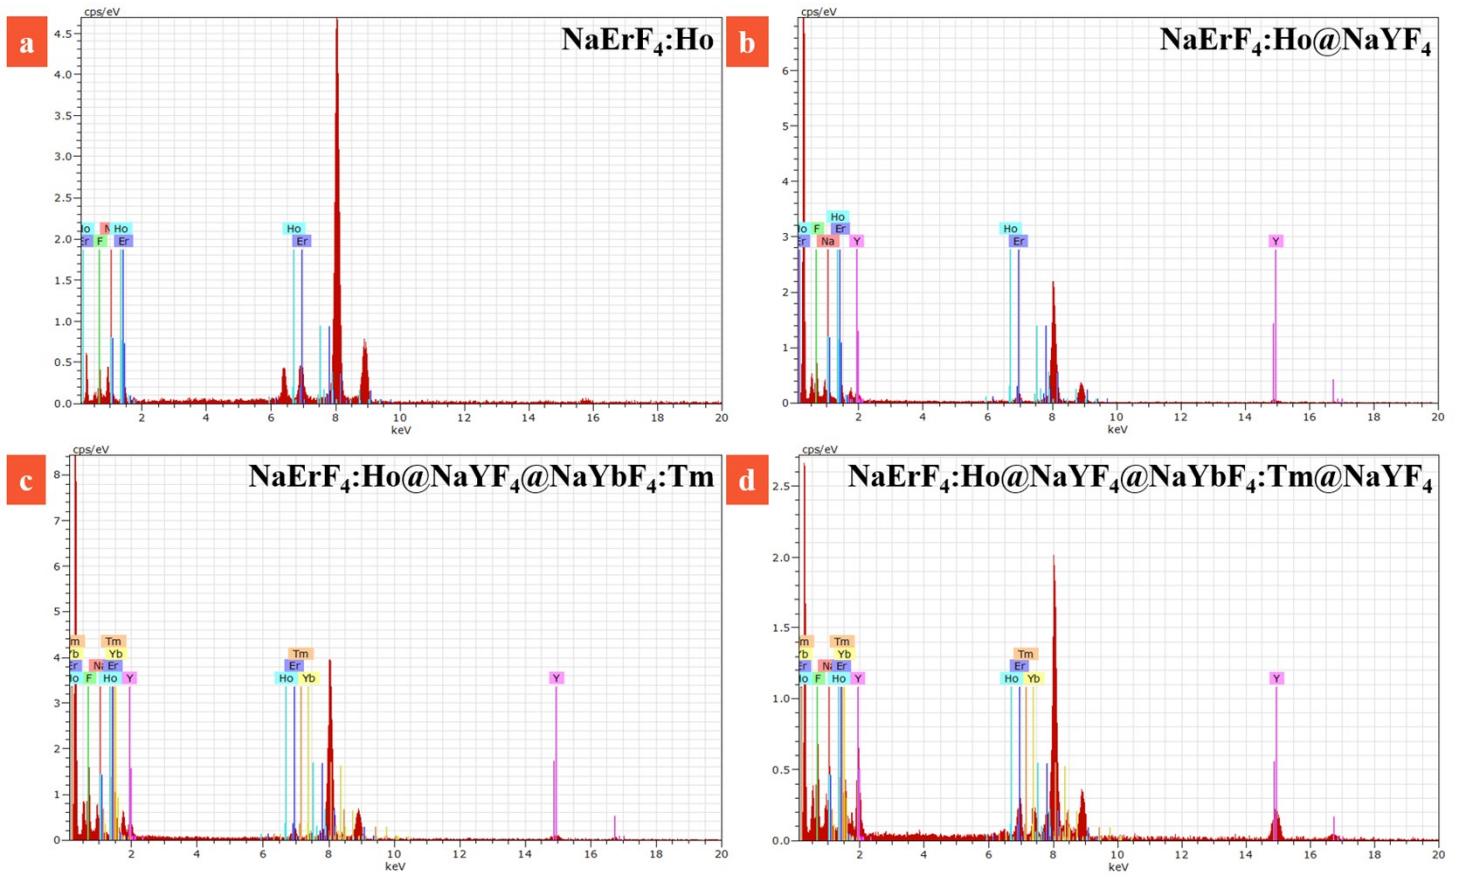

**Fig. S8** EDS (a-d) of NaErF<sub>4</sub>:2%Ho, NaErF<sub>4</sub>:2%Ho@NaYF<sub>4</sub>, NaErF<sub>4</sub>:2%Ho@NaYF<sub>4</sub>@NaYbF<sub>4</sub>:0.5%Tm and NaErF<sub>4</sub>:2%Ho@NaYF<sub>4</sub>@NaYbF<sub>4</sub>:0.5%Tm@NaYF<sub>4</sub> nanoparticles, respectively.

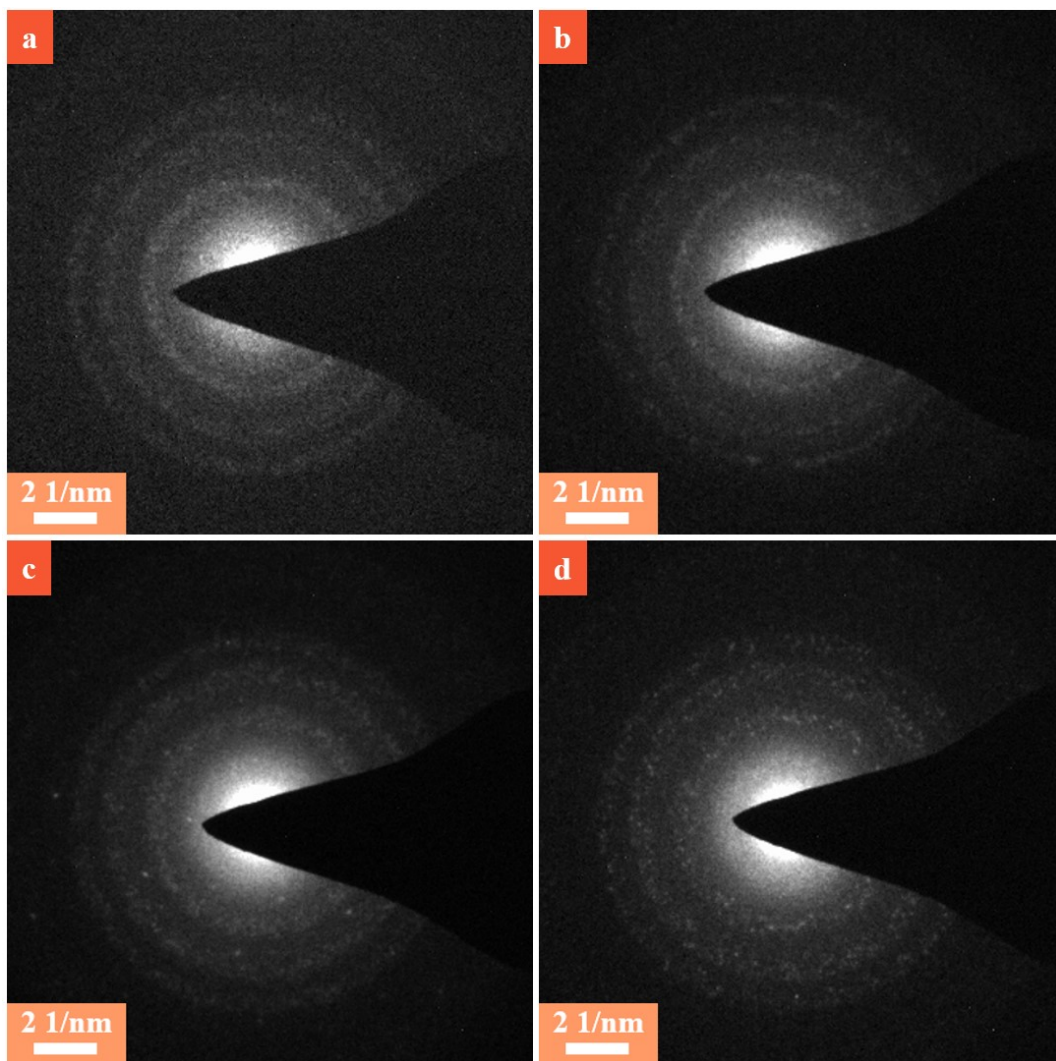

**Fig. S9** SAED patterns (a-d) of NaErF<sub>4</sub>, NaErF<sub>4</sub>:2%Ho, NaErF<sub>4</sub>:2%Ho@NaYF<sub>4</sub> and NaErF<sub>4</sub>:2%Ho@NaYF<sub>4</sub>@NaYbF<sub>4</sub>:0.5%Tm nanoparticles, respectively.

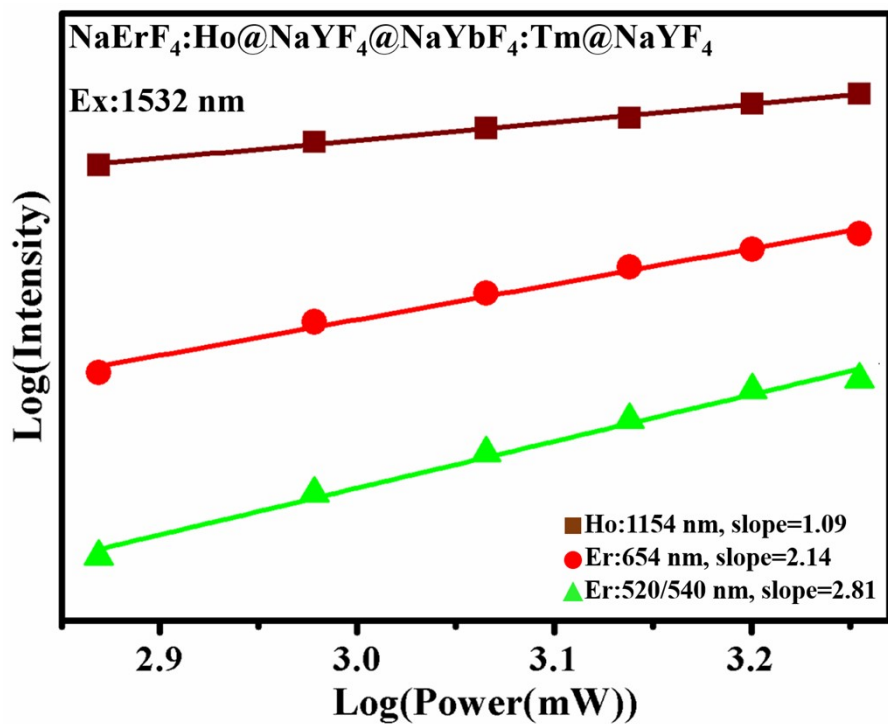

**Fig. S10** Power density dependence of Ho<sup>3+</sup> emission at 1154 nm and Er<sup>3+</sup> emissions at 654, 520/540 nm in NaErF<sub>4</sub>:2%Ho@NaYF<sub>4</sub>@NaYbF<sub>4</sub>:0.5%Tm@NaYF<sub>4</sub> nanoparticles under 1532 nm excitation.

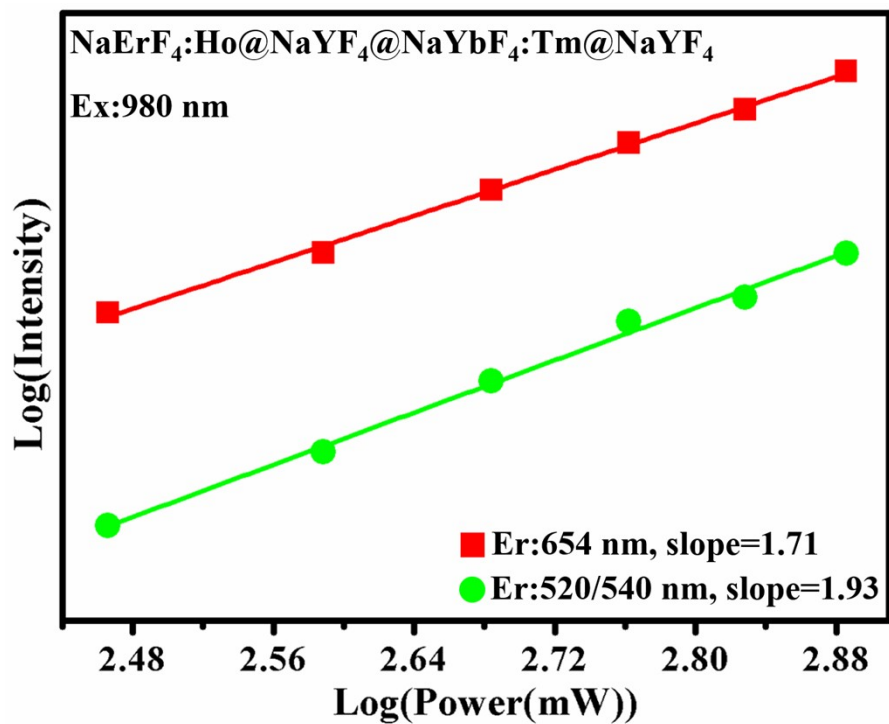

**Fig. S11** Power density dependence of Er<sup>3+</sup> emissions at 654 and 520/540 nm in NaErF<sub>4</sub>:2%Ho@NaYF<sub>4</sub>@NaYbF<sub>4</sub>:0.5%Tm@NaYF<sub>4</sub> nanoparticles under 980 nm excitation.

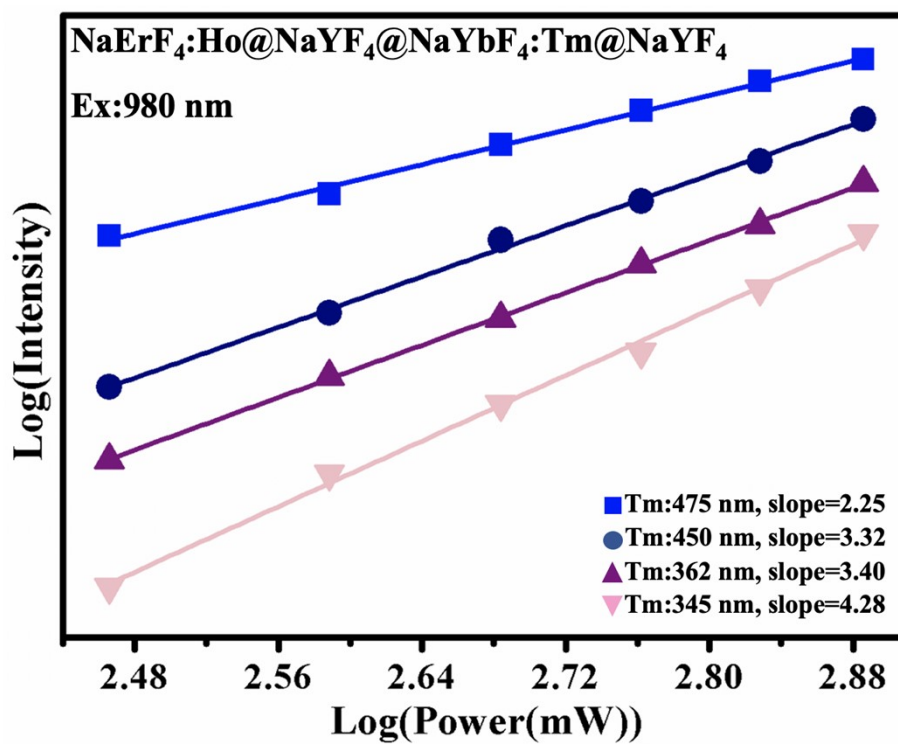

**Fig. S12** Power density dependence of Tm<sup>3+</sup> emissions at 475, 450, 362 and 345 nm in NaErF<sub>4</sub>:2%Ho@NaYF<sub>4</sub>@NaYbF<sub>4</sub>:0.5%Tm@NaYF<sub>4</sub> nanoparticles under 980 nm excitation.

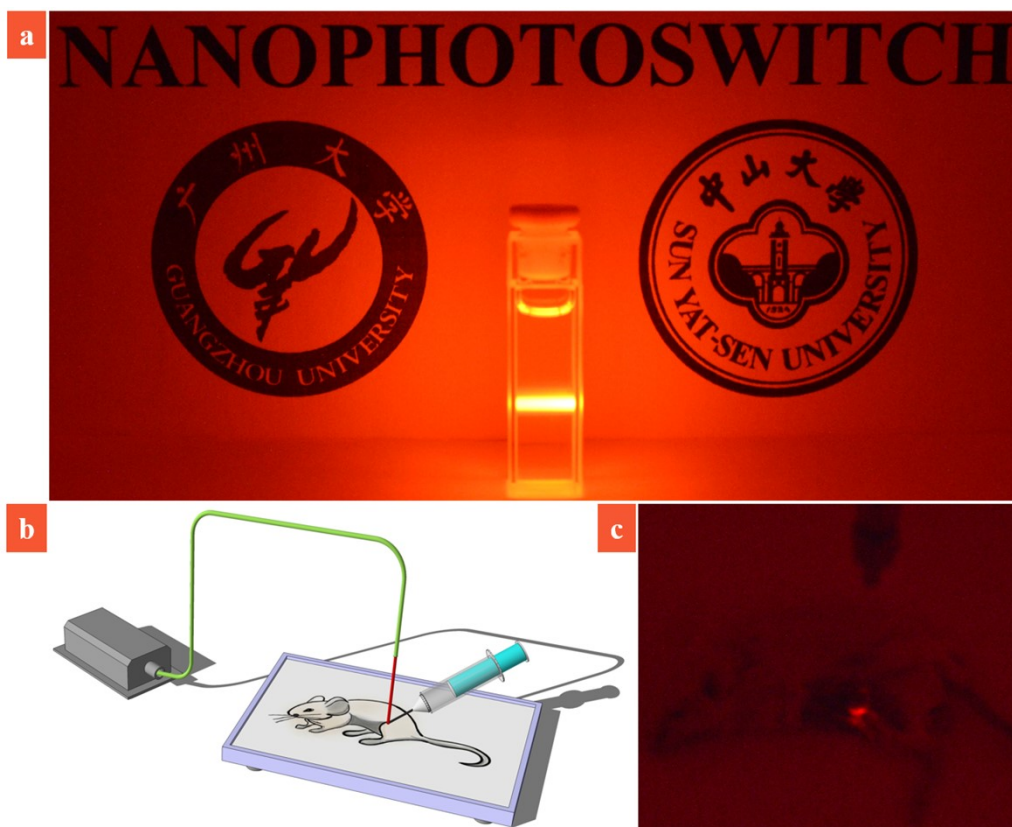

**Fig. S13** (a) Photograph of UC luminescence of  $\text{NaErF}_4:2\%\text{Ho}@ \text{NaYF}_4@ \text{NaYbF}_4:0.5\%\text{Tm}@ \text{NaYF}_4$  nanoparticles under 1532 nm NIR-II excitation. (b) Model of the nanoparticles injected into the mouse, and (c) the corresponding photograph of UC luminescence under 1532 nm NIR-II excitation.
